# Supplementary material for: Extending ligand field molecular mechanics to modelling organometallic π-bonded systems: applications to ruthenium–arenes
Source: Royal Society of Chemistry journal article supplement (doi:10.1039/c1dt10794a), 2011-01-01
Supplement: c1dt10794a.pdf [file c1dt10794a.pdf]

## Extending Ligand Field Molecular Mechanics to Modelling Organometallic $\pi$ -Bonded Systems: Applications to Ruthenium-Arenes

Ralf Brodbeck<sup>a</sup> and Robert J. Deeth<sup>\*a</sup>

Department of Chemistry, University of Warwick, Coventry CV4 7AL, UK

Table S1: Complexes used for KS-DFT calculations, symmetry of examined conformers and reference number.  
 Ru = Ru(II); bz = benzene;

| Compound                                                                 | symmetry                              | ref. number |
|--------------------------------------------------------------------------|---------------------------------------|-------------|
| [RuH <sub>6</sub> ] <sup>4+</sup>                                        | <i>O<sub>h</sub></i>                  | <b>1</b>    |
| [RuCl <sub>6</sub> ] <sup>4+</sup>                                       | <i>O<sub>h</sub></i>                  | <b>2</b>    |
| [Ru(NH <sub>2</sub> ) <sub>6</sub> ] <sup>4+</sup>                       | <i>S<sub>6</sub></i>                  | <b>3</b>    |
| [Ru(NH <sub>3</sub> ) <sub>6</sub> ] <sup>2+</sup>                       | <i>S<sub>6</sub></i>                  | <b>4</b>    |
| [Ru(py) <sub>6</sub> ] <sup>2+</sup>                                     | <i>D<sub>3</sub></i>                  | <b>5</b>    |
| [Ru(H <sub>2</sub> O) <sub>6</sub> ] <sup>2+</sup>                       | <i>S<sub>6</sub>, T<sub>h</sub></i>   | <b>6</b>    |
| [Ru(en) <sub>3</sub> ] <sup>2+</sup>                                     | <i>D<sub>3</sub></i>                  | <b>7</b>    |
| Ru(bz) <sub>2</sub> <sup>2+</sup>                                        | <i>D<sub>6h</sub>, D<sub>6d</sub></i> | <b>8</b>    |
| [RuH <sub>3</sub> (bz)]                                                  | <i>C<sub>3</sub></i>                  | <b>9</b>    |
| [RuCl <sub>3</sub> (bz)]                                                 | <i>C<sub>3v</sub></i>                 | <b>10</b>   |
| [Ru(NH <sub>2</sub> ) <sub>3</sub> (bz)] <sup>-</sup>                    | <i>C<sub>3</sub></i>                  | <b>11</b>   |
| [Ru(NH <sub>3</sub> ) <sub>3</sub> (bz)] <sup>2+</sup>                   | <i>C<sub>3</sub></i>                  | <b>12</b>   |
| [Ru(py) <sub>3</sub> (bz)] <sup>2+</sup>                                 | <i>C<sub>1</sub>, C<sub>3</sub></i>   | <b>13</b>   |
| [Ru(H <sub>2</sub> O) <sub>3</sub> (bz)] <sup>2+</sup>                   | <i>C<sub>3</sub></i>                  | <b>14</b>   |
| [RuH <sub>2</sub> (NH <sub>3</sub> )(bz)]                                | <i>C<sub>s</sub></i>                  | <b>15</b>   |
| [RuH <sub>2</sub> (NH <sub>2</sub> )(bz)] <sup>-</sup>                   | <i>C<sub>1</sub></i>                  | <b>16</b>   |
| [RuH <sub>2</sub> (H <sub>2</sub> O)(bz)]                                | <i>C<sub>s</sub></i>                  | <b>17</b>   |
| [RuH <sub>2</sub> Cl(bz)] <sup>-</sup>                                   | <i>C<sub>s</sub></i>                  | <b>18</b>   |
| [RuCl <sub>2</sub> H(bz)] <sup>-</sup>                                   | <i>C<sub>s</sub></i>                  | <b>19</b>   |
| [RuCl <sub>2</sub> (NH <sub>2</sub> )(bz)] <sup>-</sup>                  | <i>C<sub>s</sub></i>                  | <b>20</b>   |
| [RuCl <sub>2</sub> (NH <sub>3</sub> )(bz)]                               | <i>C<sub>s</sub></i>                  | <b>21</b>   |
| [RuCl <sub>2</sub> (H <sub>2</sub> O)(bz)]                               | <i>C<sub>s</sub></i>                  | <b>22</b>   |
| [Ru(NH <sub>2</sub> ) <sub>2</sub> H(bz)] <sup>-</sup>                   | <i>C<sub>1</sub>, C<sub>s</sub></i>   | <b>23</b>   |
| [Ru(NH <sub>2</sub> ) <sub>2</sub> (NH <sub>3</sub> )(bz)] <sup>-</sup>  | <i>C<sub>s</sub></i>                  | <b>24</b>   |
| [Ru(NH <sub>2</sub> ) <sub>2</sub> (H <sub>2</sub> O)(bz)]               | <i>C<sub>1</sub></i>                  | <b>25</b>   |
| [Ru(NH <sub>2</sub> ) <sub>2</sub> Cl(bz)] <sup>-</sup>                  | <i>C<sub>1</sub></i>                  | <b>26</b>   |
| [Ru(NH <sub>3</sub> ) <sub>2</sub> H(bz)] <sup>+</sup>                   | <i>C<sub>s</sub></i>                  | <b>27</b>   |
| [Ru(NH <sub>3</sub> ) <sub>2</sub> (NH <sub>2</sub> )(bz)] <sup>+</sup>  | <i>C<sub>s</sub></i>                  | <b>28</b>   |
| [Ru(NH <sub>3</sub> ) <sub>2</sub> (H <sub>2</sub> O)(bz)] <sup>2+</sup> | <i>C<sub>1</sub></i>                  | <b>29</b>   |
| [Ru(NH <sub>3</sub> ) <sub>2</sub> Cl(bz)] <sup>+</sup>                  | <i>C<sub>1</sub></i>                  | <b>30</b>   |
| [Ru(H <sub>2</sub> O) <sub>2</sub> H(bz)] <sup>+</sup>                   | <i>C<sub>1</sub></i>                  | <b>31</b>   |
| [Ru(H <sub>2</sub> O) <sub>2</sub> (NH <sub>2</sub> )(bz)] <sup>+</sup>  | <i>C<sub>1</sub></i>                  | <b>32</b>   |
| [Ru(H <sub>2</sub> O) <sub>2</sub> (NH <sub>3</sub> )(bz)] <sup>2+</sup> | <i>C<sub>1</sub></i>                  | <b>33</b>   |
| [Ru(H <sub>2</sub> O) <sub>2</sub> Cl(bz)] <sup>+</sup>                  | <i>C<sub>1</sub>, C<sub>s</sub></i>   | <b>34</b>   |

Deeth and Brodbeck

LFMM for  $\pi$ -Bonded Systems

Table S2: Charge Scheme 1 (CS1): Computed Hirshfeld charges from ADF calculations

| Compound                                                                 | Ru     | H      | Cl     | N(NH2) | H(NH2) | N(NH3) | H(NH3) | N(py)  | C(py) | H(py) | O(H2O) | H(H2O) | N(en) | HN(en) | C(en)  | HC(en) | C(bz)  | H(bz) | bz     | Total |    |
|--------------------------------------------------------------------------|--------|--------|--------|--------|--------|--------|--------|--------|-------|-------|--------|--------|-------|--------|--------|--------|--------|-------|--------|-------|----|
| [RuH <sub>6</sub> ] <sup>2+</sup>                                        | -1.084 | -0.486 |        |        |        |        |        |        |       |       |        |        |       |        |        |        |        |       |        |       | -4 |
| [RuCl <sub>6</sub> ] <sup>4+</sup>                                       | -0.082 |        | -0.653 |        |        |        |        |        |       |       |        |        |       |        |        |        |        |       |        |       | -4 |
| [Ru(NH <sub>2</sub> ) <sub>6</sub> ] <sup>4+</sup>                       | -0.112 |        |        | -0.546 | -0.051 |        |        |        |       |       |        |        |       |        |        |        |        |       |        |       | -4 |
| [Ru(NH <sub>3</sub> ) <sub>6</sub> ] <sup>2+</sup>                       | 0.194  |        |        |        |        | -0.152 | 0.151  |        |       |       |        |        |       |        |        |        |        |       |        |       | 2  |
| [Ru(py) <sub>6</sub> ] <sup>2+</sup>                                     | 0.254  |        |        |        |        |        |        | -0.069 | 0.007 | 0.065 |        |        |       |        |        |        |        |       |        |       | 2  |
| [Ru(H <sub>2</sub> O) <sub>6</sub> ] <sup>2+</sup>                       | 0.308  |        |        |        |        |        |        |        |       |       | -0.15  | 0.216  |       |        |        |        |        |       |        |       | 2  |
| [Ru(en) <sub>3</sub> ] <sup>2+</sup>                                     | 0.188  |        |        |        |        |        |        |        |       |       |        |        | -0.11 | 0.137  | -0.002 | 0.07   |        |       |        |       | 2  |
| Ru(bz) <sub>2</sub> <sup>2+</sup>                                        | 0.392  |        |        |        |        |        |        |        |       |       |        |        |       |        |        |        | 0.024  | 0.11  | 0.804  |       | 2  |
| [RuH <sub>3</sub> (bz)]                                                  | 0.044  | -0.186 |        |        |        |        |        |        |       |       |        |        |       |        |        |        | -0.101 | 0.02  | -0.486 |       | -1 |
| [RuCl <sub>3</sub> (bz)]                                                 | 0.293  |        | -0.385 |        |        |        |        |        |       |       |        |        |       |        |        |        | -0.067 | 0.044 | -0.138 |       | -1 |
| [Ru(NH <sub>2</sub> ) <sub>3</sub> (bz)]                                 | 0.338  |        |        | -0.424 | 0.025  |        |        |        |       |       |        |        |       |        |        |        | -0.094 | 0.058 | -0.216 |       | -1 |
| [Ru(NH <sub>3</sub> ) <sub>3</sub> (bz)] <sup>2+</sup>                   | 0.377  |        |        |        |        | -0.131 | 0.162  |        |       |       |        |        |       |        |        |        | -0.003 | 0.096 | 0.558  |       | 2  |
| [Ru(py) <sub>3</sub> (bz)] <sup>2+</sup>                                 | 0.347  |        |        |        |        |        |        | -0.063 | 0.018 | 0.074 |        |        |       |        |        |        | -0.01  | 0.087 | 0.462  |       | 2  |
| [Ru(H <sub>2</sub> O) <sub>3</sub> (bz)] <sup>2+</sup>                   | 0.44   |        |        |        |        |        |        |        |       |       | -0.148 | 0.218  |       |        |        |        | 0.011  | 0.105 | 0.696  |       | 2  |
| [RuH <sub>2</sub> (NH <sub>3</sub> )(bz)]                                | 0.163  | -0.138 |        |        |        | -0.157 | 0.13   |        |       |       |        |        |       |        |        |        | -0.067 | 0.047 | -0.12  |       | 0  |
| [RuH <sub>2</sub> (NH <sub>2</sub> )(bz)]                                | 0.168  | -0.167 |        | -0.402 | 0.018  |        |        |        |       |       |        |        |       |        |        |        | -0.099 | 0.021 | -0.468 |       | -1 |
| [RuH <sub>2</sub> (H <sub>2</sub> O)(bz)]                                | 0.184  | -0.139 |        |        |        |        |        |        |       |       | -0.182 | 0.168  |       |        |        |        | -0.061 | 0.051 | -0.06  |       | 0  |
| [RuH <sub>2</sub> Cl(bz)]                                                | 0.14   | -0.146 | -0.464 |        |        |        |        |        |       |       |        |        |       |        |        |        | -0.091 | 0.027 | -0.384 |       | -1 |
| [RuCl <sub>2</sub> H(bz)]                                                | 0.225  | -0.123 | -0.419 |        |        |        |        |        |       |       |        |        |       |        |        |        | -0.08  | 0.036 | -0.264 |       | -1 |
| [RuCl <sub>2</sub> (NH <sub>2</sub> )(bz)]                               | 0.314  |        | -0.388 | -0.376 | 0.024  |        |        |        |       |       |        |        |       |        |        |        | -0.074 | 0.039 | -0.21  |       | -1 |
| [RuCl <sub>2</sub> (NH <sub>3</sub> )(bz)]                               | 0.325  |        | -0.294 |        |        | -0.166 | 0.111  |        |       |       |        |        |       |        |        |        | -0.046 | 0.062 | 0.096  |       | 0  |
| [RuCl <sub>2</sub> (H <sub>2</sub> O)(bz)]                               | 0.336  |        | -0.266 |        |        |        |        |        |       |       | -0.202 | 0.118  |       |        |        |        | -0.04  | 0.067 | 0.162  |       | 0  |
| [Ru(NH <sub>2</sub> ) <sub>2</sub> H(bz)]                                | 0.267  | -0.155 |        | -0.387 | 0.022  |        |        |        |       |       |        |        |       |        |        |        | -0.095 | 0.024 | -0.426 |       | -1 |
| [Ru(NH <sub>2</sub> ) <sub>2</sub> (NH <sub>3</sub> )(bz)]               | 0.212  |        |        | -0.175 | 0.055  | -0.325 | 0.101  |        |       |       |        |        |       |        |        |        | -0.062 | 0.052 | -0.06  |       | 0  |
| [Ru(NH <sub>2</sub> ) <sub>2</sub> (H <sub>2</sub> O)(bz)]               |        |        |        |        |        |        |        |        |       |       |        |        |       |        |        |        |        |       |        |       |    |
| [Ru(NH <sub>2</sub> ) <sub>2</sub> Cl(bz)]                               | 0.344  |        | -0.4   | -0.375 | 0.025  |        |        |        |       |       |        |        |       |        |        |        | -0.083 | 0.034 | -0.294 |       | -1 |
| [Ru(NH <sub>3</sub> ) <sub>2</sub> H(bz)] <sup>+</sup>                   | 0.275  | -0.101 |        |        |        | -0.142 | 0.147  |        |       |       |        |        |       |        |        |        | -0.034 | 0.072 | 0.228  |       | 1  |
| [Ru(NH <sub>3</sub> ) <sub>2</sub> (NH <sub>2</sub> )(bz)] <sup>+</sup>  | 0.35   |        |        | -0.3   | 0.082  | -0.144 | 0.137  |        |       |       |        |        |       |        |        |        | -0.032 | 0.074 | 0.252  |       | 1  |
| [Ru(NH <sub>3</sub> ) <sub>2</sub> (H <sub>2</sub> O)(bz)] <sup>2+</sup> | 0.382  |        |        |        |        | -0.128 | 0.164  |        |       |       | -0.154 | 0.219  |       |        |        |        | 0.002  | 0.099 | 0.606  |       | 2  |
| [Ru(NH <sub>3</sub> ) <sub>2</sub> Cl(bz)] <sup>+</sup>                  | 0.337  |        | -0.207 |        |        | -0.147 | 0.138  |        |       |       |        |        |       |        |        |        | -0.024 | 0.08  | 0.336  |       | 1  |
| [Ru(H <sub>2</sub> O) <sub>2</sub> H(bz)] <sup>+</sup>                   | 0.31   | -0.102 |        |        |        |        |        |        |       |       | -0.158 | 0.199  |       |        |        |        | -0.026 | 0.078 | 0.312  |       | 1  |
| [Ru(H <sub>2</sub> O) <sub>2</sub> (NH <sub>2</sub> )(bz)] <sup>+</sup>  |        |        |        |        |        |        |        |        |       |       |        |        |       |        |        |        |        |       |        |       |    |
| [Ru(H <sub>2</sub> O) <sub>2</sub> (NH <sub>3</sub> )(bz)] <sup>2+</sup> | 0.413  |        |        |        |        | -0.127 | 0.164  |        |       |       | -0.152 | 0.218  |       |        |        |        | 0.007  | 0.102 | 0.654  |       | 2  |
| [Ru(H <sub>2</sub> O) <sub>2</sub> Cl(bz)] <sup>+</sup>                  | 0.378  |        | -0.168 |        |        |        |        |        |       |       | -0.165 | 0.175  |       |        |        |        | -0.016 | 0.086 | 0.42   |       | 1  |

Table S3: Charge Scheme 2 (CS2): Averaged charges (not including homoleptic species)

| Ru    | H      | Cl     | N(NH2) | H(NH2) | N(NH3) | H(NH3) | N(py)  | C(py) | H(py) | O(H2O) | H(H2O) | C(bz)  | H(bz) | bz    |
|-------|--------|--------|--------|--------|--------|--------|--------|-------|-------|--------|--------|--------|-------|-------|
| 0.287 | -0.143 | -0.336 | -0.352 | 0.035  | -0.163 | 0.139  | -0.065 | 0.015 | 0.072 | -0.166 | 0.188  | -0.049 | 0.061 | 0.070 |

Table S4: AOM parameterisation details

CL-:

Since  $[\text{RuCl}_6]^{4-}$  (**2**) is octahedral, independent values for  $e_\sigma$  and  $e_\pi$  cannot be determined. Therefore, as we have done previously, we performed a PES scan for  $D_{4h}$   $[\text{RuCl}_4]^{2-}$  (using the same internuclear distances and the same method as in the PES scan for **2**). From the usual AOM formalism for square planar complexes, the  $e_\sigma$  and  $e_\pi$  parameters for the tetrachlororuthenate can be obtained, as well as the  $e_{ds}$  mixing parameter. The ratio  $e_\sigma/e_\pi$  ( $\approx 4$ ) in  $[\text{RuCl}_4]^{2-}$  was then used to calculate the  $e_\sigma$  and  $e_\pi$  parameters of **2**. The  $e_{ds}$  parameter was used unmodified.

N:

For the AOM parameters of the atom type “N” we studied compound **4**. Although its lowest energy conformer is  $S_6$  symmetric, the distortion of its Ru-N<sub>6</sub> nuclear frame from  $O_h$  symmetry is very small. From the rigid PES scan (keeping the  $S_6$  symmetry and using the ADC procedure) the distance dependence of  $\Delta_{\text{oct}}$ , and, because NH<sub>3</sub> is a  $\sigma$ -only donor, also the distance dependence of  $e_\sigma$  can be obtained. At each point the arithmetic mean of the orbitals 17–18 a<sub>g</sub>, which form the  $e_g$ -like set and the 14–16 a<sub>g</sub> orbitals, which form the  $t_{2g}$ -like set, were used in the  $e_\sigma$  calculation.

(exp.  $\Delta_{\text{oct}}$  in  $[\text{Ru}(\text{en})_3]^{2+}$  25450 cm<sup>-1</sup>)

Du:

In the AOM parameterisation of the benzene ligand all carbon centres were treated as one virtual atom positioned at the carbon atoms' centroid. In the rigid PES scan using the ADC procedure we used the eclipsed,  $D_{6h}$  symmetric conformation of **8**, which is the minimum on all hypersurfaces we examined. The  $e_\sigma$  and  $e_\pi$  parameters were calculated from the KS-MO energy differences using the AOM formalism for linear  $ML_2$  systems without  $\delta$ -bonding and we omitted the estimation of an  $e_{ds}$  parameter.

OH2:

For the AOM parameterisation of the “OH2” atom type we examined compound **6**. The lowest energy conformer of **6** is  $S_6$  symmetric, but the deviation of its Ru-O<sub>6</sub> nuclear frame from  $O_h$  symmetry is too large so we proceeded to use a  $T_h$  symmetric conformation of **6** in the rigid PES scan and got from this the distance dependence of  $\Delta$ , which only yields the distance dependence of the ratio  $e_\sigma/e_{\pi\perp}$ . The parameter  $e_{\pi\perp}$  is the AOM parameter for the  $\pi$ -type interaction between the lone-pair on the water molecule's oxygen atom and the ruthenium's d-AOs. From a rigid PES scan (using the ADC approximation and the same internuclear distances as for the PES scan of the hexaquo complex) of a  $D_{2h}$  symmetric conformation of **6** we could fix  $e_\sigma$  and  $e_\pi$  and calculate  $e_\sigma$  and  $e_{\pi\perp}$  in **6**'s  $T_h$  symmetric conformation.

HYDR:

To estimate the AOM parameters of the “HYDR” atom type we examined compound **1**. Its lowest energy conformer is  $O_h$  symmetric. Interestingly, all Ru d-AOs are used in the occupied bonding MOs. Nevertheless, we obtained the distance dependency of the  $e_\sigma$  parameter using the usual AOM formalism for octahedral complexes from the distance dependence of the energy difference of the d-AO dominated occupied MOs  $1e_g^2$  and  $1t_{2g}^6$  in a normal PES scan (no ADC procedure).

“NIDO” and “NM” atom type:

The AOM parameters of the “NIDO” atom type were obtained following a similar procedure as for the “OH2” atom type using a  $T_h$  symmetric conformer of compound **3**. (The lowest energy conformer of **3** is  $S_6$  symmetric but similarly to **6**, the Ru-N nuclear frame deviates significantly from  $O_h$  symmetry.) Although the amide anion is isoelectronic with water and therefore also capable of forming a  $\pi$ -bond to Ru, which gives rise to an  $e_{\pi\perp}$  parameter, in the LFMM parameter optimisation the latter turned out to be superfluous. Therefore only the  $e_\sigma$  parameter is part of the final parameter set.

Because of their chemical similarity, the LFMM parameter set for “NIDO” and “NM” atom types are the same. However, in order to be able to distinguish these donors in the non-LFMM region (which is parameterised by the MMFF94 FF) they are assigned different type names.

NPYR:

For the AOM parameterisation of the “NPYR” atom type we examined compound **5** whose lowest energy conformer is  $D_2$  symmetric. We proceeded as already described for the “CL-” atom type;  $[\text{RuCl}_4]^{2-}$  has to be substituted by  $[\text{Ru}(\text{py})_4]^{2+}$ . Because of the steric demands of the pyridine ligands a completely square planar complex is not accomplishable. Instead, we used a  $D_{4h}$  symmetric conformation of  $[\text{Ru}(\text{py})_4]^{2+}$  in which the pyridine ring normals lie in the Ru-N plane.

Interestingly also in the optimization of the molecular mechanics LFMM parameter of the “NPYR” atom type the  $e_{\pi\perp}$  parameter turned out to be a source of difficulty in that the sign of  $e_{\pi\perp}$  changes during the PES scan. This, combined with its relatively small value led us to discarded  $\pi$  bonding. Therefore only the  $e_{\sigma}$  and the  $e_{ds}$  parameter are part of the final parameter set.

Table S5: LFMM parameter values

```
# Latest version of LFMM parameter file for Ru(II)-arene complexes
[Morse]
# DFT-optimised
#Ru+2 CL- 2.44986 49.9539 1.52463
#Ru+2 Du 1.96747 125.113 1.26661
Ru+2 HYDR 1.77451 100 0.92886
#Ru+2 N 2.34732 80.036 1.14342
Ru+2 NIDO 2.12741 150.036 1.31545
Ru+2 NM 2.12741 150.036 1.31545
Ru+2 NPYD 2.27033 150 1.09853
#Ru+2 OH2 2.35756 170 0.697935
# Structure refined
Ru+2 Du 1.9300 125.113 1.26661
Ru+2 N 2.3000 80.036 1.14342
Ru+2 OH2 2.23 170.0 0.8
Ru+2 CL- 2.50 49.9539 1.52463
%
[ll]
Ru+2 CL- 7310.55 6
Ru+2 Du 0 6
Ru+2 HYDR 250 6
Ru+2 N 1606.99 6
Ru+2 NIDO 661.009 6
Ru+2 NM 661.009 6
Ru+2 N5B 100 6
Ru+2 OH2 775.289 6
%
[esig]
Ru+2 CL- 0 0 0 0 0 1.52292e+006 -2.2473e+006
Ru+2 Du 891 0 0 13032 0 0 0
Ru+2 HYDR 0 0 29276 0 0 0 0
Ru+2 N 0 0 0 0 91921 267451 0
Ru+2 NIDO 0 0 0 -1.81012e+006 1.08361e+007 -2.03018e+007 1.23141e+007
Ru+2 NM 0 0 0 -1.81012e+006 1.08361e+007 -2.03018e+007 1.23141e+007
Ru+2 N5B 0 0 -179272 843858 -671272 0 0
Ru+2 OH2 0 0 0 -209022 918562 -677107 0
%
[epix]
Ru+2 CL- 0 1354.96 -500805 2.82704e+006 -5.32132e+006 3.25777e+006 0
Ru+2 Du -5123 0 72332 0 0 0 0
Ru+2 HYDR 0 0 0 0 0 0 0
Ru+2 N 0 0 0 0 0 0 0
Ru+2 NIDO 0 0 0 0 0 0 0
Ru+2 NM 0 0 0 0 0 0 0
Ru+2 NPYD 0 0 0 0 0 0 0
Ru+2 OH2 0 0 0 0 0 0 0
%
[epiy]
Ru+2 CL- 0 1354.96 -500805 2.82704e+006 -5.32132e+006 3.25777e+006 0
Ru+2 Du -5123 0 72332 0 0 0 0
Ru+2 HYDR 0 0 0 0 0 0 0
Ru+2 N 0 0 0 0 0 0 0
Ru+2 NIDO 0 0 0 0 0 0 0
Ru+2 NM 0 0 0 0 0 0 0
```

```
Ru+2 NPYD -7038.09 0 121185 -156909 0 0 0
Ru+2 OH2 0 0 0 554544 -3.61027e+006 7.96321e+006 -5.74335e+006
%
[exds]
Ru+2 CL- 0 0 0 0 0 0 406901
Ru+2 Du 0 0 0 0 0 0 0
Ru+2 N 0 0 0 0 0 0 300000
Ru+2 NIDO 0 0 0 0 0 0 300000
Ru+2 NM 0 0 0 0 0 0 300000
Ru+2 HYDR 0 0 0 0 0 0 0
Ru+2 NPYD 0 0 0 -52433.5 222321 -166430 0
#Ru+2 OH2 0 0 0 0 0 0 300000
Ru+2 OH2 0 0 0 0 0 0 0
%
```

Table S6: Full comparison of bond length difference (obs-calc, Å), M-L rms values and heavy-atom overlay rmsds for each half-sandwich complex.

| Refcode | Du    | N     | N     | NM    | NM    | NIDO | NIDO | NPYD | OH2   | CL-   | HYDR | M-L(rms) | Heavy Atom rmsd |
|---------|-------|-------|-------|-------|-------|------|------|------|-------|-------|------|----------|-----------------|
| CAFPOP  | -0.01 | 0.00  | -0.02 |       |       |      |      |      |       | -0.01 |      | 0.013    | 0.32            |
| CAFQAC  | -0.01 | 0.00  | 0.01  |       |       |      |      |      |       | 0.02  |      | 0.011    | 1.05            |
| CEKDIG  | -0.01 | -0.02 | -0.02 |       |       |      |      |      |       | 0.02  |      | 0.017    | 0.14            |
| CEKDOM  | -0.01 | 0.02  | -0.01 |       |       |      |      |      |       | 0.02  |      | 0.014    | 0.17            |
| CEKFII  | -0.02 | -0.02 | -0.03 |       |       |      |      | 0.02 |       |       |      | 0.021    | 0.18            |
| CIJFEH  | -0.01 | -0.01 | -0.03 |       |       |      |      |      |       | 0.00  |      | 0.016    | 1.24            |
| CIJFIL  | 0.00  | 0.00  | 0.01  |       |       |      |      |      |       | 0.02  |      | 0.011    | 0.87            |
| CIJFOR  | 0.00  | -0.01 | -0.01 |       |       |      |      |      |       | 0.02  |      | 0.014    | 2.07            |
| DOMTAB  | 0.01  | 0.00  |       | -0.06 | -0.02 |      |      |      |       |       |      | 0.034    | 0.60            |
| FEEGUT  | -0.01 | 0.02  |       | -0.03 |       |      |      |      |       | -0.02 |      | 0.020    | 0.46            |
| INUNAG  | -0.01 | 0.02  | 0.04  |       |       |      |      |      | -0.06 |       |      | 0.037    | 0.95            |
| INUNEK  | -0.01 | 0.02  | 0.02  |       |       |      |      |      | 0.02  |       |      | 0.018    | 0.17            |
| INUNIO  | -0.02 | 0.01  | 0.02  |       |       |      |      |      | -0.05 |       |      | 0.027    | 0.40            |
| INUNOU  | 0.00  | 0.02  | 0.03  |       |       |      |      |      | -0.02 |       |      | 0.019    | 0.15            |
| IPAKOZ  | -0.01 | 0.01  | -0.01 |       |       |      |      |      |       | 0.02  |      | 0.015    | 0.21            |
| IPAKUF  | -0.01 | 0.01  | -0.01 |       |       |      |      |      |       | 0.04  |      | 0.022    | 0.37            |
| IVEMOL  | -0.02 | -0.03 | 0.02  |       |       |      |      |      |       | 0.03  |      | 0.024    | 0.14            |
| IVEMUR  | 0.00  | -0.02 | 0.02  |       |       |      |      |      |       | 0.03  |      | 0.020    | 0.12            |
| IVENAY  | -0.01 | 0.01  | 0.01  |       |       |      |      |      |       | 0.02  |      | 0.013    | 0.22            |
| IVENEC  | -0.01 | 0.01  | 0.01  |       |       |      |      |      |       | 0.02  |      | 0.013    | 0.22            |
| IVENIG  | 0.00  | -0.02 | -0.03 |       |       |      |      |      |       | 0.00  |      | 0.017    | 0.33            |
| KEYJUT  | 0.04  | 0.07  |       |       |       | 0.04 |      |      |       | 0.09  |      | 0.065    | 1.03            |
| LARYEI  | -0.01 | -0.05 | -0.02 |       |       |      |      |      |       | 0.05  |      | 0.039    | 0.76            |
| LAZZIW  | -0.02 | 0.01  | 0.03  |       |       |      |      |      | -0.08 |       |      | 0.045    | 0.44            |
| LAZZOC  | -0.01 | 0.00  | -0.02 |       |       |      |      |      |       | 0.03  |      | 0.017    | 0.12            |
| MIDMOC  | 0.00  | 0.02  | 0.01  |       |       |      |      |      |       | 0.00  |      | 0.009    | 0.06            |
| MIDMUI  | -0.01 | 0.00  | -0.01 |       |       |      |      |      |       | 0.02  |      | 0.010    | 0.24            |
| MIDNET  | -0.01 | -0.01 | -0.01 |       |       |      |      |      |       | 0.02  |      | 0.014    | 0.11            |
| MIMRUV  | -0.02 | -0.01 | -0.01 |       |       |      |      |      |       | 0.03  |      | 0.017    | 0.46            |

Deeth and Brodbeck

LFMM for  $\pi$ -Bonded Systems

|          |       |       |       |       |  |       |      |      |       |      |       |      |
|----------|-------|-------|-------|-------|--|-------|------|------|-------|------|-------|------|
| MIMSAC   | 0.00  | -0.01 | -0.01 |       |  |       |      |      | 0.02  |      | 0.015 | 0.74 |
| MISPEK   | -0.01 | -0.02 | -0.03 |       |  |       |      | 0.02 |       |      | 0.021 | 0.13 |
| OKAMIW   | -0.04 | -0.02 |       | -0.05 |  |       |      |      | 0.00  |      | 0.031 | 1.20 |
| OKAMOC   | -0.01 | 0.01  |       | -0.02 |  |       |      |      | 0.02  |      | 0.015 | 0.78 |
| PEWCID   | -0.02 | -0.01 |       |       |  | 0.02  |      |      | 0.02  |      | 0.016 | 0.15 |
| QASJAW   | -0.01 | 0.00  | 0.01  |       |  |       |      |      | 0.02  |      | 0.013 | 1.13 |
| RIHFOD   | -0.04 |       |       | 0.02  |  | 0.18  |      |      |       |      | 0.109 | 0.51 |
| RIHFUJ   | -0.03 | 0.02  |       | -0.03 |  |       |      |      |       | 0.18 | 0.093 | 0.58 |
| SECKOB   | -0.04 | 0.00  |       |       |  | 0.05  |      |      | -0.02 |      | 0.031 | 0.66 |
| TANROQ   | -0.01 | -0.01 |       | -0.04 |  |       |      |      | 0.00  |      | 0.023 | 0.59 |
| TAXFON10 | -0.01 | 0.01  |       | -0.04 |  |       |      |      | 0.00  |      | 0.020 | 0.33 |
| TOBTOT   | -0.01 | -0.01 |       |       |  | 0.05  |      |      | -0.01 |      | 0.027 | 0.51 |
| TOBVAH   | -0.01 | -0.03 |       |       |  | 0.00  | 0.04 |      |       |      | 0.027 | 0.44 |
| TOBVEL   | -0.02 | 0.02  |       |       |  | -0.02 |      |      | -0.06 |      | 0.035 | 1.14 |
| WOCMUW   | 0.00  | 0.03  | -0.06 |       |  |       |      |      | 0.01  |      | 0.031 | 0.48 |
| XEBTUU   | -0.01 | 0.00  | -0.01 |       |  |       |      |      | 0.03  |      | 0.017 | 0.41 |
| ZALWIS   | 0.00  | 0.02  |       | -0.03 |  |       |      |      | -0.03 |      | 0.024 | 0.67 |
| ZUKGER   | -0.04 | 0.02  |       | 0.01  |  |       |      |      | 0.01  |      | 0.023 | 0.33 |
